# Supplementary material for: N-1 Perfusion Platform Development Using a Capacitance Probe for Biomanufacturing
Source: MDPI journal article supplement (doi:10.3390/bioengineering9040128), 2022-03-22
Supplement: s1 [file s1]

A

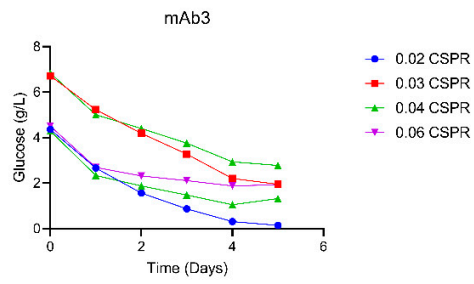

F

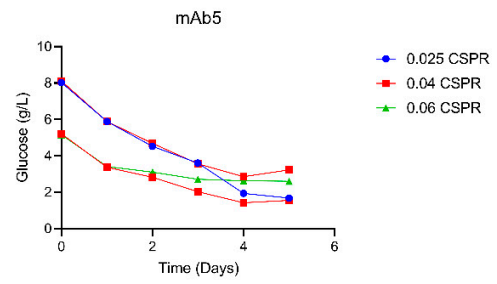

B

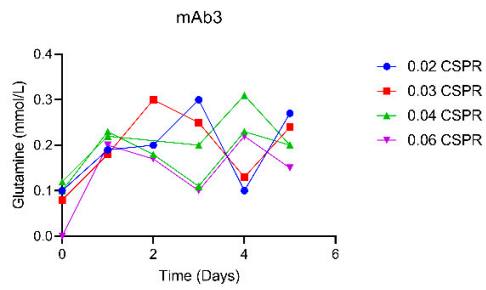

G

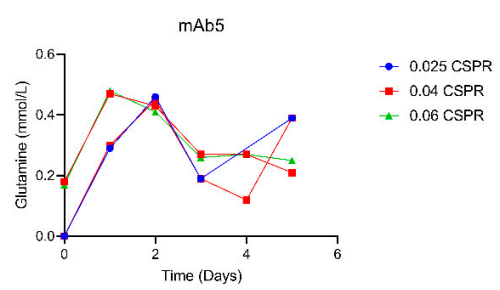

C

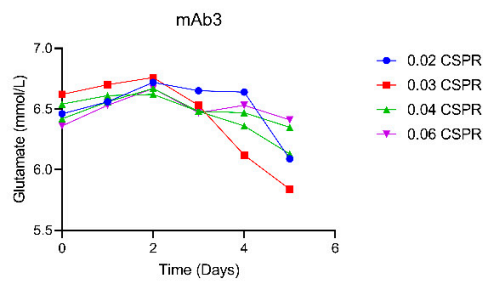

H

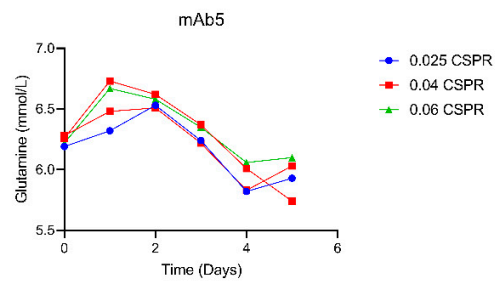

D

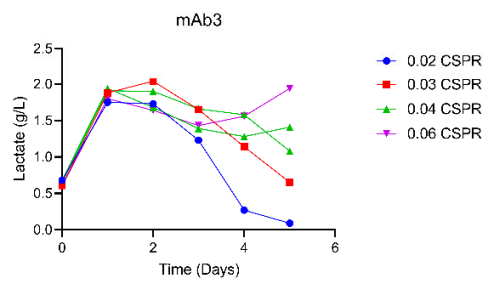

I

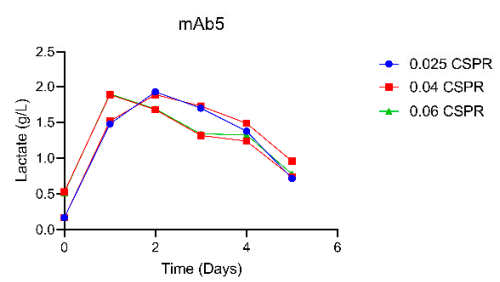

E

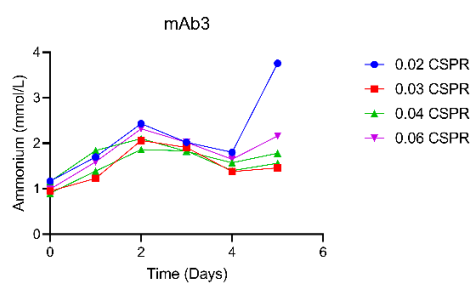

J

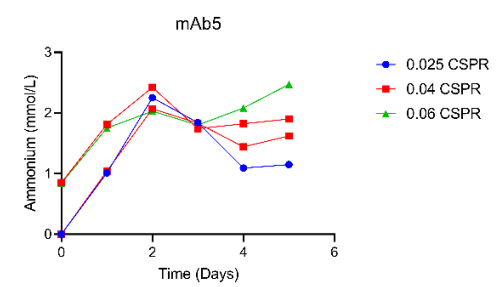

2 **Supplemental figure 1. Metabolite profiles for CSPR development.** For mAb3, glucose, glutamine,  
3 glutamate, lactate, ammonium are plotted for each CSPR tested in A, B, C, D, E, respectively. For mAb5,  
4 glucose, glutamine, glutamate, lactate, ammonium are plotted for each CSPR tested in F, G, H, I, J. Each  
5 line plotted represents one bioreactor (n=1). Metabolites were measured using Roche Cedex.

A

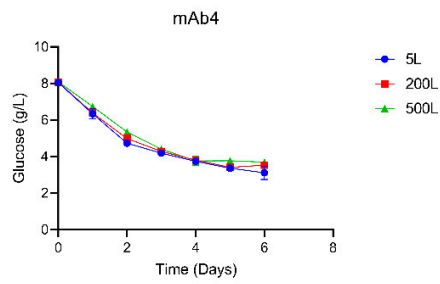

F

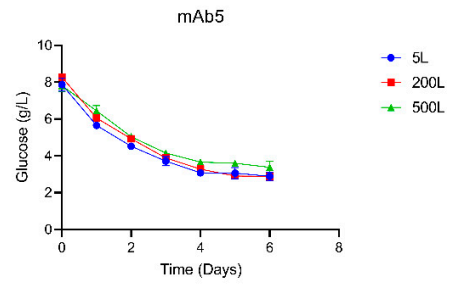

B

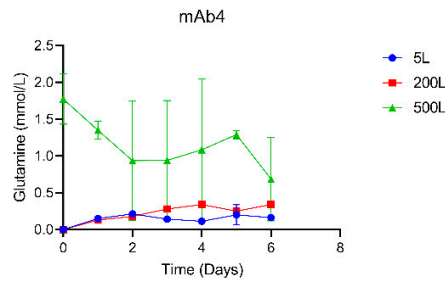

G

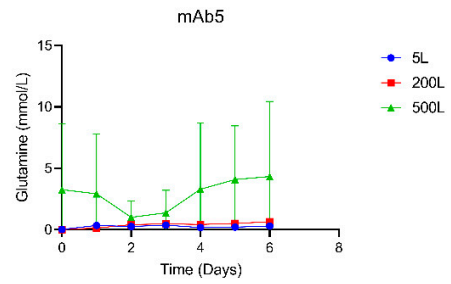

C

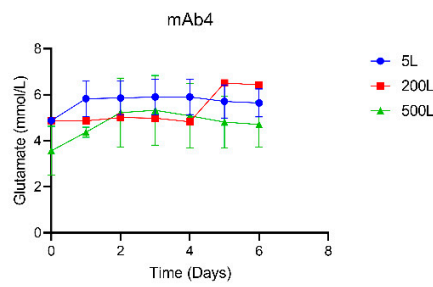

H

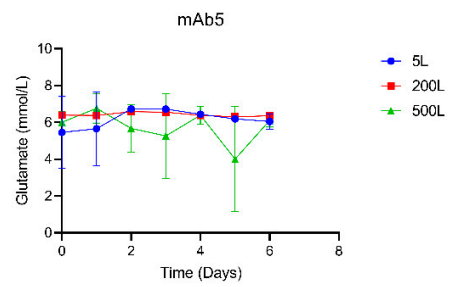

D

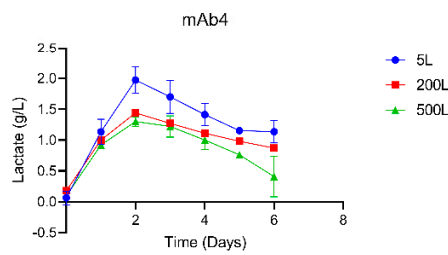

I

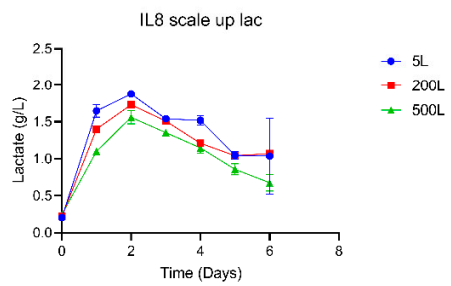

E

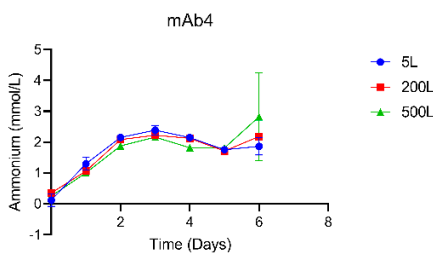

J

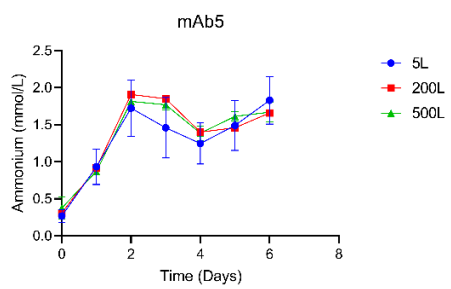

**Supplemental figure 2. Metabolite profiles for scale up bioreactors controlled with the capacitance probe.** For mAb4, glucose, glutamine, glutamate, lactate, ammonium are plotted for each CSPR tested in A, B, C, D, E, respectively. For mAb5, glucose, glutamine, glutamate, lactate, ammonium are plotted for each CSPR tested in F, G, H, I, J. For 5L n=3, for 200L, n=1, 500L n=3. 5L and 200L metabolites were measured using Roche Cedex and 500L metabolites were measured using Nova BioProfile FLEX2.
